# Supplementary material
Source: PubMed Central journal article supplement (PMC5019951)
Supplement: NIHMS751318-supplement-01.pdf [file NIHMS751318-supplement-01.pdf]

Supplementary Table 1: Initial Hits

| Compound                          | %Inhib     | % Viability (Viab*inhib) | Grouping/Target |                                    |
|-----------------------------------|------------|--------------------------|-----------------|------------------------------------|
|                                   |            | /100                     |                 |                                    |
| Chlorambucil                      | 67         | 66                       | 44              | alkylating agent                   |
| <b>Pararosaniline Pamoate</b>     | <b>98</b>  | <b>63</b>                | <b>62</b>       | <b>aniline dye</b>                 |
| <b>Anthothecol</b>                | <b>102</b> | <b>48</b>                | <b>49</b>       | <b>anthothecol</b>                 |
| <b>Phenethyl Caffate (Cape)</b>   | <b>80</b>  | <b>100</b>               | <b>80</b>       | <b>anti-inflammatory</b>           |
| Gramicidin                        | 103        | 35                       | 37              | antibiotic                         |
| <b>Fexofenadine Hydrochloride</b> | <b>88</b>  | <b>60</b>                | <b>53</b>       | <b>antihistamine /choline</b>      |
| Alexidine Hydrochloride           | 42         | 101                      | 43              | antiseptic                         |
| Tetrachloroisophthalonitrile      | 62         | 87                       | 54              | antiseptic                         |
| <b>Dequalinium Chloride</b>       | <b>83</b>  | <b>75</b>                | <b>62</b>       | <b>antiseptic</b>                  |
| Cetylpyridinium Chloride          | 63         | 64                       | 41              | antiseptic                         |
| <b>Gentian Violet</b>             | <b>102</b> | <b>62</b>                | <b>64</b>       | <b>antiseptic</b>                  |
| Thiram                            | 91         | 59                       | 54              | antiseptic                         |
| Thimerosal                        | 97         | 50                       | 48              | antiseptic                         |
| <b>Artemimol</b>                  | <b>62</b>  | <b>68</b>                | <b>42</b>       | <b>artemisinin</b>                 |
| <b>Avocadynone Acetate</b>        | <b>85</b>  | <b>93</b>                | <b>79</b>       | <b>avocado</b>                     |
| Oxfendazole                       | 46         | 100                      | 47              | benzimidazole anti-helminth        |
| <b>Oxibendazole</b>               | <b>86</b>  | <b>67</b>                | <b>57</b>       | <b>benzimidazole anti-helminth</b> |
| Methicillin Sodium                | 60         | 53                       | 32              | beta lactam antibiotic             |
| <b>Nisoldipine</b>                | <b>56</b>  | <b>62</b>                | <b>35</b>       | <b>calcium channel blocker</b>     |
| <b>Monensin Sodium</b>            | <b>71</b>  | <b>46</b>                | <b>33</b>       | <b>cation ionophor</b>             |
| <b>Lasalocid Sodium</b>           | <b>93</b>  | <b>43</b>                | <b>40</b>       | <b>cation ionophor</b>             |
| <b>Celastrol</b>                  | <b>72</b>  | <b>73</b>                | <b>52</b>       | <b>celestroid</b>                  |
| Cantharidin                       | 100        | 66                       | 66              | cell adhesion                      |
| Mundoserone                       | 32         | 74                       | 23              | chemo hematopoeisis                |
| 4-Nonylphenol                     | 34         | 97                       | 33              | detergent                          |
| Methotrexate                      | 79         | 67                       | 53              | DHFR                               |
| <b>Cedrelone</b>                  | <b>86</b>  | <b>66</b>                | <b>57</b>       | <b>differentiation</b>             |
| Mitomycin C                       | 97         | 62                       | 60              | DNA crosslinker                    |
| Amsacrine                         | 100        | 58                       | 58              | DNA intercalator                   |
| Apomorphine Hydrochloride         | 35         | 89                       | 31              | dopamine antagonist                |
| <b>Chlorpromazine</b>             | <b>88</b>  | <b>48</b>                | <b>42</b>       | <b>dopamine antagonist</b>         |
| Antimycin A (A1 Shown)            | 59         | 58                       | 34              | electron transport                 |
| Deferoxamine Mesylate             | 44         | 84                       | 37              | Fe chelation                       |
| Tacrolimus                        | 34         | 75                       | 25              | FKBP                               |
| Aminacrine                        | 39         | 65                       | 25              | fluorescent dye/nucleotide         |
| Evans Blue                        | 47         | 116                      | 54              | fusion                             |
| Dihydrogambogic Acid              | 101        | 61                       | 62              | gambogic acid                      |
| <b>Gambogic Acid Amide</b>        | <b>102</b> | <b>55</b>                | <b>55</b>       | <b>gambogic acid</b>               |
| Acetyl Isogambogic Acid           | 91         | 53                       | 48              | gambogic acid                      |
| Acivicin                          | 35         | 73                       | 26              | glutamine analog                   |
| Mycophenolic Acid                 | 89         | 55                       | 49              | immuno T cell supp                 |
| <b>Cloxyquin</b>                  | <b>93</b>  | <b>62</b>                | <b>58</b>       | <b>ion channel</b>                 |
| <b>Valinomycin</b>                | <b>86</b>  | <b>54</b>                | <b>46</b>       | <b>K ionophore</b>                 |
| Salinomycin, Sodium               | 89         | 46                       | 40              | K ionophore                        |
| <b>Nigericin</b>                  | <b>84</b>  | <b>46</b>                | <b>38</b>       | <b>K ionophore</b>                 |
| Methyl Deoxycholate               | 35         | 102                      | 36              | lipid                              |
| <b>Simvastatin</b>                | <b>69</b>  | <b>64</b>                | <b>44</b>       | <b>lipid</b>                       |
| <b>Picropodophyllotoxin</b>       | <b>105</b> | <b>87</b>                | <b>91</b>       | <b>microtubule</b>                 |
| 4'-Demethylepipodophyllotoxin     | 92         | 85                       | 77              | microtubule                        |
| Albendazole                       | 89         | 75                       | 67              | microtubule                        |
| Podophyllotoxin Acetate           | 100        | 74                       | 74              | microtubule                        |
| Podofilox                         | 99         | 70                       | 70              | microtubule                        |
| Vinblastine Sulfate               | 94         | 69                       | 65              | microtubule                        |
| Paclitaxel                        | 102        | 68                       | 69              | microtubule                        |
| Vincristine Sulfate               | 97         | 66                       | 64              | microtubule                        |

| <b>Compound</b>                      | <b>%Inhib</b> | <b>% Viability (Viab*inhib)</b> | <b>Grouping/Target</b> |                                 |
|--------------------------------------|---------------|---------------------------------|------------------------|---------------------------------|
|                                      |               | <b>/100</b>                     |                        |                                 |
| Beta-Peltatin                        | 97            | 65                              | 63                     | microtubule                     |
| Colchicine                           | 96            | 64                              | 62                     | microtubule                     |
| Dihydroclastryl Diacetate            | 97            | 63                              | 61                     | microtubule                     |
| <b>Colchicine</b>                    | <b>99</b>     | <b>63</b>                       | <b>62</b>              | <b>microtubule</b>              |
| Apigenin                             | 31            | 84                              | 26                     | monoamine transporter activator |
| <b>Sanguinarine Sulfate</b>          | <b>99</b>     | <b>50</b>                       | <b>49</b>              | <b>Na/K ATPase inhib</b>        |
| Gitoxigenin Diacetate                | 97            | 40                              | 39                     | <b>Na/K ATPase inhib</b>        |
| Peruvoside                           | 101           | 40                              | 40                     | <b>Na/K ATPase inhib</b>        |
| Gitoxin                              | 101           | 39                              | 39                     | <b>Na/K ATPase inhib</b>        |
| Convallatoxin                        | 107           | 39                              | 41                     | <b>Na/K ATPase inhib</b>        |
| Strophanthidin                       | 100           | 37                              | 37                     | <b>Na/K ATPase inhib</b>        |
| <b>Digoxigenin</b>                   | <b>100</b>    | <b>37</b>                       | <b>37</b>              | <b>Na/K ATPase inhib</b>        |
| Lanatoside C                         | 87            | 36                              | 31                     | <b>Na/K ATPase inhib</b>        |
| Ouabain                              | 92            | 33                              | 30                     | <b>Na/K ATPase inhib</b>        |
| 6-Aminonicotinamide                  | 40            | 84                              | 34                     | NAD                             |
| Ciclopirox Olamine                   | 67            | 57                              | 38                     | NaK ATPase                      |
| Trichlormethine                      | 83            | 70                              | 58                     | nitrogen mustard                |
| Oxyphenbutazone                      | 33            | 76                              | 25                     | NSAID                           |
| <b>Celecoxib</b>                     | <b>99</b>     | <b>62</b>                       | <b>61</b>              | <b>NSAID</b>                    |
| 5-Fluoro-5'-Deoxyuridine             | 33            | 101                             | 34                     | nucleoside                      |
| Thioguanine                          | 58            | 84                              | 49                     | nucleoside                      |
| <b>5-Azacytidine</b>                 | <b>94</b>     | <b>77</b>                       | <b>73</b>              | <b>nucleoside</b>               |
| Edoxudine                            | 51            | 70                              | 36                     | nucleoside                      |
| Floxuridine                          | 91            | 63                              | 58                     | nucleoside                      |
| Ancitabine Hydrochloride             | 92            | 61                              | 57                     | nucleoside                      |
| Cytarabine                           | 87            | 61                              | 53                     | nucleoside                      |
| Phenylmercuric Acetate               | 72            | 52                              | 37                     | organomercuric                  |
| Orlistat                             | 35            | 115                             | 40                     | protease                        |
| Meclocyline Sulfosalicylate          | 57            | 80                              | 46                     | protein synthesis               |
| Puromycin Hydrochloride              | 54            | 77                              | 42                     | protein synthesis               |
| Cycloheximide                        | 98            | 73                              | 72                     | protein synthesis               |
| Anisomycin                           | 100           | 59                              | 58                     | protein synthesis               |
| <b>Emetine</b>                       | <b>93</b>     | <b>66</b>                       | <b>61</b>              | <b>protozoa</b>                 |
| Lefunamide                           | 42            | 72                              | 30                     | pyrimidine synthesis inhib      |
| <b>Rotenone</b>                      | <b>90</b>     | <b>71</b>                       | <b>63</b>              | <b>rotenoid</b>                 |
| Deguelin(-)                          | 52            | 71                              | 36                     | rotenoid                        |
| Isorotenone                          | 67            | 67                              | 45                     | rotenoid                        |
| Dihydrorotenone                      | 84            | 59                              | 49                     | rotenoid                        |
| Sappanone A Dimethyl Ether           | 91            | 60                              | 54                     | sappanone                       |
| Deoxysappanone B 7,3'-Dimethyl Ether | 94            | 56                              | 53                     | sappanone                       |
| Acetate                              |               |                                 |                        |                                 |
| Deoxysappanone B 7,4'-Dimethyl Ether | 91            | 55                              | 50                     | sappanone                       |
| <b>3,4-Dimethoxydalbergione</b>      | <b>100</b>    | <b>52</b>                       | <b>52</b>              | <b>sappanone</b>                |
| <b>Sertaline Hydrochloride</b>       | <b>54</b>     | <b>96</b>                       | <b>52</b>              | <b>serotonin</b>                |
| Clomipramine Hydrochloride           | 31            | 78                              | 24                     | serotonin                       |
| Prednisolone Hemisuccinate           | 49            | 88                              | 43                     | steroid                         |
| Prednisolone Hemisuccinate           | 96            | 68                              | 65                     | steroid                         |
| Cetrimonium Bromide                  | 76            | 93                              | 70                     | surfactant                      |
| Benzalkonium Chloride                | 34            | 91                              | 31                     | surfactant                      |
| Noxynol-9                            | 52            | 80                              | 41                     | surfactant                      |
| <b>Minocycline Hydrochloride</b>     | <b>48</b>     | <b>80</b>                       | <b>38</b>              | <b>tetracycline antibiotic</b>  |
| Camptothecin                         | 108           | 74                              | 80                     | topoisomerase                   |
| <b>Mitoxanthrone Hydrochloride</b>   | <b>109</b>    | <b>73</b>                       | <b>80</b>              | <b>topoisomerase</b>            |
| Teniposide                           | 104           | 56                              | 58                     | topoisomerase                   |
| Bleomycin                            | 74            | 55                              | 41                     | topoisomerase                   |
| Etoposide                            | 97            | 50                              | 49                     | topoisomerase                   |
| <b>Patulin</b>                       | <b>101</b>    | <b>52</b>                       | <b>52</b>              | <b>toxin</b>                    |

| <b>Compound</b>                                             | <b>%Inhib</b> | <b>% Viability (Viab*inhib)</b> | <b>Grouping/Target</b> |               |
|-------------------------------------------------------------|---------------|---------------------------------|------------------------|---------------|
|                                                             |               | <b>/100</b>                     |                        |               |
| Dactinomycin                                                | 101           | 58                              | 58                     | transcription |
| <b>Niclosamide</b>                                          | <b>76</b>     | <b>63</b>                       | <b>47</b>              | <b>worms</b>  |
| Tomatine                                                    | 39            | 91                              | 36                     |               |
| 4,4'-Dimethoxydalbergione                                   | 37            | 87                              | 32                     |               |
| Methylbenzethonium Chloride                                 | 48            | 85                              | 40                     |               |
| <b>Mundulone</b>                                            | <b>58</b>     | <b>82</b>                       | <b>47</b>              |               |
| <b>7-Oxocallitric Acid, Methyl Ester</b>                    | <b>63</b>     | <b>75</b>                       | <b>48</b>              |               |
| Rubescensin A                                               | 39            | 72                              | 28                     |               |
| P-Fluorophenylalanine                                       | 55            | 72                              | 39                     |               |
| 2,6-Dimethoxyquinone                                        | 45            | 71                              | 32                     |               |
| <b>Obtusaquinone</b>                                        | <b>73</b>     | <b>70</b>                       | <b>51</b>              |               |
| <b>1-</b>                                                   | <b>103</b>    | <b>68</b>                       | <b>69</b>              |               |
| <b>Benzyloxycarbonylamino phenethyl Chloromethyl Ketone</b> |               |                                 |                        |               |
| <b>2,3-Dichloro-5,8-Dihydroxynapthoquinone</b>              | <b>89</b>     | <b>66</b>                       | <b>59</b>              |               |
| 7-Desacetoxy-6,7-Dehydrogedunin                             | 67            | 58                              | 39                     |               |
| Aklavine Hydrochloride                                      | 72            | 53                              | 38                     |               |
| <b>Piplartine</b>                                           | <b>83</b>     | <b>51</b>                       | <b>42</b>              |               |
| Crinamine                                                   | 64            | 48                              | 31                     |               |

Supplementary Table 2: Follow up Titrations

| Compound                                              | CF IC50 (µM) | CC IC50 (µM) | Cell Free LC50 (µM) | Cell Cell LC50 (µM) | Cell Free TI (µM) | Cell Cell TI (µM) | CC/CF IC50 | Celltiter TI | TZM TI | Mechanism of Action                                                                                                                     | Therapeutic Uses                                 | Published anti-HIV activity |
|-------------------------------------------------------|--------------|--------------|---------------------|---------------------|-------------------|-------------------|------------|--------------|--------|-----------------------------------------------------------------------------------------------------------------------------------------|--------------------------------------------------|-----------------------------|
| Colchicine                                            | 0.01         | 0.01         | >100                | >100                | >10663            | >8920             | 1.2        | 0.5          |        | Inhibits microtubule polymerization                                                                                                     | NA                                               | Yes                         |
| Celecoxib                                             | 0.1          | 0.1          | >100                | >100                | >836              | >986              | 0.8        | 3.3          | 1.5    | (NSAID) and selective COX-2 inhibitor                                                                                                   | Arthritis, Pain Relief                           | Yes                         |
| Rotenone                                              | 0.1          | 0.1          | >100                | >100                | >836              | >986              | 0.8        | 0.0          |        | Interferes with the electron transport chain in mitochondria                                                                            | NA                                               |                             |
| Celastrol                                             | 0.3          | 0.3          | >100                | >100                | >398              | >291              | 1.4        | 0.8          |        | Antioxidant, anti-inflammatory, anticancer, and insecticidal activities                                                                 | NA                                               | Yes (Tat)                   |
| Obtusaquinone                                         | 1.7          | 1.9          | >100                | >100                | >57               | >53               | 1.1        | NA           |        | Fungicide                                                                                                                               | NA                                               |                             |
| Phenethyl Caffate (Cape)                              | 1.7          | 4.4          | >100                | >100                | >57               | >22               | 2.6        | 0.8          |        | Antioxidant, immunomodulatory, anti-inflammatory                                                                                        | NA                                               | Yes                         |
| 5-Azacytidine                                         | 1.2          | 4.7          | >100                | >100                | >84               | >21               | 4.0        | 0.5          |        | Inhibits DNA methylation and protein synthesis                                                                                          | NA                                               | Yes (Ribonucleoside)        |
| Artemimol                                             | 0.8          | 5.1          | 0.8                 | >100                | 1.0               | >19               | 6.8        | 1.0          |        | Believed to alter parasite Glucose metabolism in erythrocytes                                                                           | Malaria                                          |                             |
| Mundulone                                             | 4.8          | 11.1         | >100                | >100                | 21.0              | 9.0               | 2.3        | 1.5          |        | Inhibitors of human tyrosyl-DNA phosphodiesterase 1                                                                                     | NA                                               |                             |
| Cloxyquin                                             | 12.5         | 11.3         | >100                | >100                | >8                | >8.8              | 0.9        | 0.4          |        | Activates Potassium Channel TRESK                                                                                                       | NA                                               |                             |
| Minocycline Hydrochloride                             | 8.7          | 13.7         | >100                | >100                | >11.4             | >7.3              | 1.6        | 3.6          |        | Binds to bacterial 30S ribosome                                                                                                         | broad-spectrum tetracycline antibiotic           | Yes                         |
| 1Benzyloxycarbonylamino phenethyl Chloromethyl Ketone | 0.6          | 0.5          | 0.6                 | 1.9                 | 1.0               | 3.8               | 0.9        | 0.9          |        |                                                                                                                                         | NA                                               |                             |
| Pararosaniline Pamoate                                | 0.4          | 0.4          | 32.4                | 1.6                 | 88.1              | 3.7               | 1.2        | NA           |        | Structurally related crystal violet                                                                                                     | Anti-Schistosome                                 |                             |
| 3,4-Dimethoxydalbergione                              | 2.9          | 1.4          | 2.9                 | 2.3                 | 1.0               | 1.7               | 0.5        | 0.8          |        |                                                                                                                                         | NA                                               |                             |
| Valinomycin                                           | 0.1          | 0.1          | 0.4                 | 0.2                 | 5.7               | 1.6               | 1.6        | 1.2          |        | Potassium transporter                                                                                                                   | Antibiotic                                       |                             |
| Sertaline Hydrochloride                               | 15.9         | 8.0          | 28.2                | 12.2                | 1.8               | 1.5               | 0.5        | NA           |        | Inhibitor of the selective serotonin reuptake inhibitor (SSRI) class I                                                                  | Anti-depressant (Zoloft)                         |                             |
| Sanguinarine Sulfate                                  | 2.3          | 1.5          | 7.3                 | 2.2                 | 3.2               | 1.4               | 0.7        | NA           |        | Toxin that affects Na <sup>+</sup> -K <sup>+</sup> -ATPase transmembrane protein                                                        | NA                                               | Yes (Protease)              |
| Nisoldipine                                           | 9.7          | 7.1          | >100                | 8.5                 | >10.3             | 1.2               | 0.7        | 6.6          | 1.5    | Nisoldipine (INN) is a calcium channel blocker of the dihydropyridine class                                                             | High Blood Pressure (Sular)                      |                             |
| Gambogic Acid Amide                                   | 0.8          | 0.6          | 1.3                 | 0.7                 | 1.6               | 1.2               | 0.7        | 1.4          |        | Caspase activator and apoptosis inducer, causes G2/M arrest                                                                             | NA                                               |                             |
| 2,3-Dichloro-5,8-Dihydroxynaphthoquinone              | 0.8          | 0.4          | 0.7                 | 0.4                 | 0.9               | 1.1               | 0.5        | 0.6          |        |                                                                                                                                         | NA                                               |                             |
| Patulin                                               | 1.1          | 0.8          | 1.0                 | 0.8                 | 1.0               | 1.1               | 0.7        | 0.7          |        | Mycotoxin produced by a variety of molds, high affinity for sulfhydryl groups                                                           | NA                                               |                             |
| Picropodophyllotoxin                                  | 0.2          | 0.2          | 0.7                 | 0.2                 | 3.4               | 1.0               | 1.0        | 0.1          |        | IGF1R and microtubule inhibitor                                                                                                         | NA                                               |                             |
| 7-Oxocallitric Acid                                   | >100         | >100         | >100                | >100                | >1                | >1                | 1.0        | NA           |        |                                                                                                                                         | NA                                               |                             |
| Chlorpromazine                                        | 5.9          | 5.8          | 40.9                | 5.8                 | 6.9               | 1.0               | 1.0        | 0.9          |        | Dopamine antagonist, also anti-adrenergic, anti-serotonergic, anti-cholinergic, anti-histaminic                                         | antipsychotic                                    | Yes                         |
| Piplartine                                            | 3.3          | 2.8          | 2.0                 | 2.6                 | 0.6               | 0.9               | 0.9        | 0.2          |        | Induces caspase-mediated apoptosis in PC-3 human prostate cancer cells                                                                  | NA                                               |                             |
| Oxibendazole                                          | 0.9          | 1.0          | >100                | 0.7                 | 107.1             | 0.7               | 1.0        | 0.6          |        |                                                                                                                                         | anti parasitic in domesticated animals           |                             |
| Niclosamide                                           | 2.8          | 2.9          | 1.4                 | 2.0                 | 0.5               | 0.7               | 1.0        | 0.7          |        | Uncouples oxidative phosphorylation in the tapeworm                                                                                     | teniacide                                        |                             |
| Gentian Violet                                        | 0.2          | 0.3          | 9.6                 | 0.2                 | 47.2              | 0.6               | 1.6        | 1.8          | 0.9    | Crystal violet has antibacterial, antifungal, and anthelmintic                                                                          | Topical antiseptic                               |                             |
| Monensin                                              | 0.1          | 0.2          | 0.1                 | 0.1                 | 1.3               | 0.6               | 2.2        | 8.3          | <0.1   | Ionophore for ions such as Li <sup>+</sup> , Na <sup>+</sup> , K <sup>+</sup> , Rb <sup>+</sup> , Ag <sup>+</sup> , and Tl <sup>+</sup> | Anti-parasitic in livestock                      | Yes (glycosylation)         |
| Fexofenadine Hydrochloride                            | 1.7          | 1.5          | 1.3                 | 0.7                 | 0.8               | 0.4               | 0.9        | 1.0          |        | H1-blocker of the GI tract, large blood vessels, and bronchial smooth muscle.                                                           | Allergies (Zyrtec)                               |                             |
| Lasalocid Sodium                                      | 2.2          | 2.2          | 0.9                 | 0.9                 | 0.4               | 0.4               | 1.0        | 5.1          | 3.1    | Cation Transport through membrane.                                                                                                      | Antibacterial animal food additive (Bovatec)     |                             |
| Digoxigenin                                           | 1.5          | 1.8          | >100                | 0.7                 | >66               | 0.4               | 1.2        | 0.5          |        | Highly antigenic, used in immuno tagging                                                                                                | NA                                               |                             |
| Dequalinium                                           | 0.5          | 3.2          | 0.3                 | 0.7                 | 0.6               | 0.2               | 5.9        |              |        | Dequalinium is a quaternary ammonium cation                                                                                             | Topical bacteriostat                             |                             |
| Mitoxantrone Hydrochloride                            | 0.1          | 0.2          | >100                | 0.0                 | >1676             | 0.2               | 2.6        | 0.5          | 1.1    | Type II topoisomerase inhibitor                                                                                                         | NA                                               |                             |
| Nigericin Sodium                                      | 0.1          | 0.2          | 0.1                 | 0.0                 | 0.7               | 0.1               | 1.7        | 9.6          | 72.2   | H <sup>+</sup> , K <sup>+</sup> , Pb <sup>2+</sup> ionophore. It inhibits Golgi functions.                                              | Antibiotic active against gram positive bacteria | Yes                         |
| Simvastatin                                           | 5.9          | 3.4          | NA                  | NA                  | NA                | NA                | 0.6        | 6.5          | 20.9   | Statin that inhibits HMG-CoA Reductase                                                                                                  | hypercholesterolemia                             |                             |
| Emetine                                               | 1.4          | 0.4          | NA                  | NA                  | NA                | NA                | 0.3        | 0.4          |        | Inhibitor of protein synthesis.                                                                                                         | Induce Vomiting, anti protozoal                  | Yes (RNA processing)        |
